# Supplementary material for: Placebo Response in Randomized Controlled Trials of Antidepressants for Pediatric Major Depressive Disorder
Source: Atypon-hosted journal article supplement (doi:10.1176/appi.ajp.2008.08020247), 2008-12-01
Supplement: ajp_166_01_0042_01.pdf [file ajp_166_01_0042_01.pdf]

**SUPPLEMENTAL FIGURE. Proportion of Participants Assigned to Placebo Who Were Rated  $\leq 2$  (Much Improved or Very Much Improved) on the Clinical Global Impressions Improvement (CGI-I) Scale at End of Treatment by Age Group<sup>a</sup>**

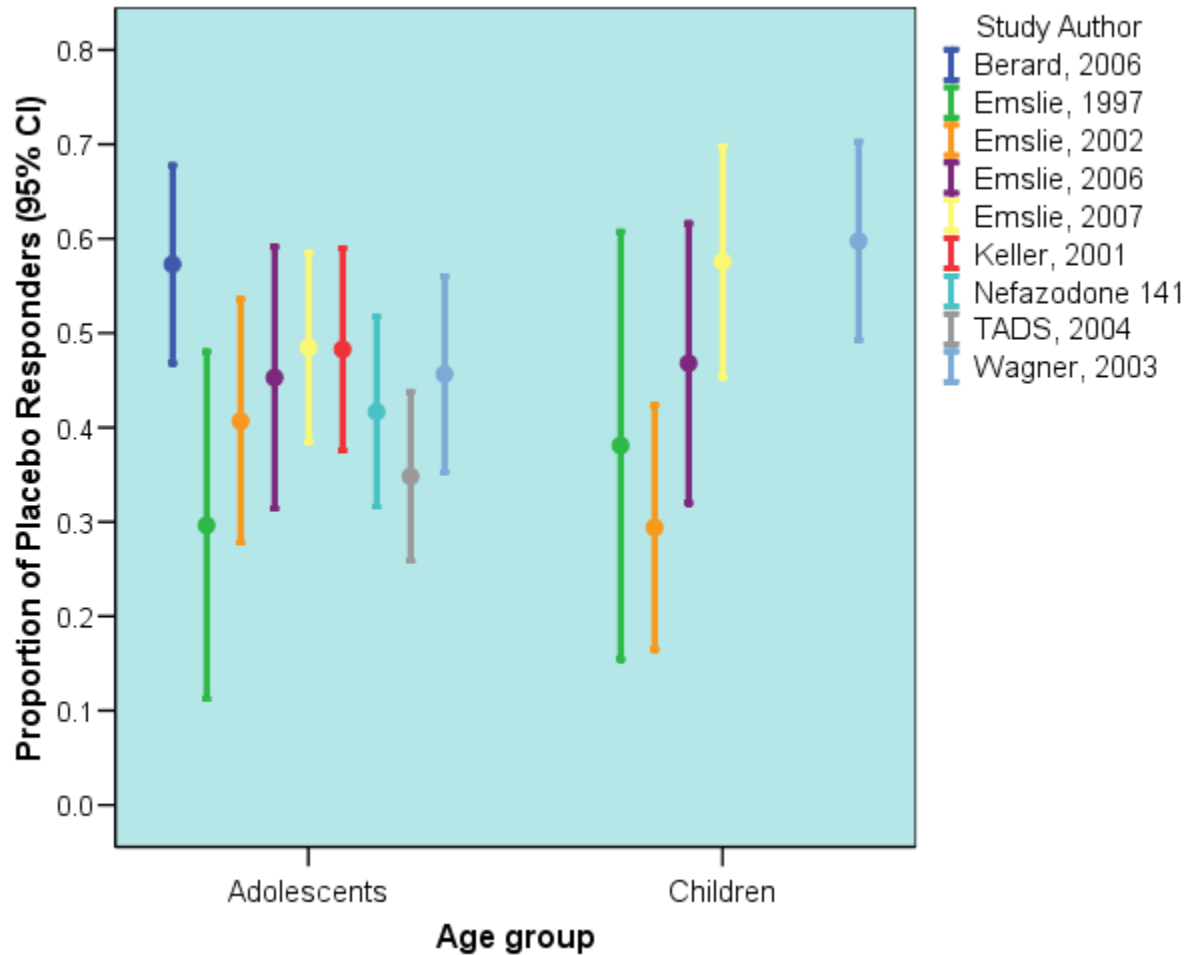

<sup>a</sup>Children are <12 or 13 years and adolescents are  $\geq 12$  or 13 years, depending on study definition. The average proportion of participants per study who responded while receiving placebo was 0.50 among children and 0.45 among adolescents ( $\chi^2=2.1$ ,  $P$  value=.15). Sensitivity analyses were conducted by iteratively deleting each study and calculating the resulting effect sizes. Removing the Emslie et al. (2002) trial, the average proportion of placebo responders per study was 0.54 among children and 0.45 among adolescents ( $\chi^2=5.9$ ,  $P$  value=.02).
